# Supplementary material
Source: PubMed Central journal article supplement (PMC6702603)
Supplement: DC190244SupplementaryData.pdf [file DC190244SupplementaryData.pdf]

## SUPPLEMENTARY DATA

### **Regression from Prediabetes to Normal Glucose Regulation and Prevalence of Microvascular Disease in the Diabetes Prevention Program Outcomes Study (DPPOS)**

Leigh Perreault, MD<sup>1</sup>, Qing Pan, PhD<sup>2</sup>, Emily B. Schroeder, MD, PhD<sup>1,3</sup>, Rita R. Kalyani, MD, MHS<sup>4</sup>, George A. Bray, MD<sup>5</sup>, Samuel Dagogo-Jack, MD<sup>6</sup>, Neil H. White, MD<sup>7</sup>, Ronald B. Goldberg, MD<sup>8</sup>, Steven E. Kahn, MB, ChB<sup>9</sup>, William C. Knowler, MD, DrPH<sup>10</sup>, Nestoras Mathioudakis, MD, MHS<sup>4</sup>, Dana Dabelea, MD, PhD<sup>11</sup> for the Diabetes Prevention Program Research Group

#### **Supplemental Materials:**

1. Supplemental Table 1
2. Supplemental Table 2
3. Investigators Appendix

SUPPLEMENTARY DATA

**Supplementary Table S1.** Microvascular outcomes for those who ever vs. never regressed to normoglycemia, stratified by treatment group, reported as the number of cases (#) and number at risk (%)

|             | ever          |               |               | never         |               |               |
|-------------|---------------|---------------|---------------|---------------|---------------|---------------|
|             | lifestyle     | metformin     | placebo       | lifestyle     | metformin     | placebo       |
| no MVD      | 236/324(72.8) | 181/238(76.1) | 144/190(75.8) | 263/384(68.5) | 328/493(66.5) | 361/550(65.6) |
| one MVD     | 74/324(22.8)  | 51/238(21.4)  | 41/190(21.6)  | 92/384(24.0)  | 121/493(24.5) | 161/550(29.3) |
| two MVD     | 14/324(4.3)   | 6/238(2.5)    | 4/190(2.1)    | 28/384(7.3)   | 44/493(8.9)   | 25/550(4.5)   |
| three MVD   | 0/324(0)      | 0/238(0)      | 1/190(0.1)    | 1/384(0.0)    | 0/493(0)      | 3/550(0.1)    |
| nephropathy | 47/405(11.6)  | 32/294(10.9)  | 21/232(9.1)   | 73/485(15.1)  | 109/607(18.0) | 99/678(14.6)  |
| retinopathy | 35/369(9.5)   | 27/268(10.1)  | 12/213(5.6)   | 52/441(11.8)  | 70/555(12.6)  | 83/636(13.1)  |
| neuropathy  | 34/333(10.2)  | 21/248(8.5)   | 24/198(12.1)  | 39/400(9.8)   | 69/510(13.5)  | 73/564(12.9)  |

SUPPLEMENTARY DATA

**Supplementary Table S2** Models presented in Table 2 inclusive of other potential confounders and mediators

| <b>AGGREGATE MICROVASCULAR DISEASE</b>                                     |                   |           |           |               |
|----------------------------------------------------------------------------|-------------------|-----------|-----------|---------------|
| <b>Adjustment Covariates</b>                                               | <b>95% CI</b>     |           |           |               |
|                                                                            | <b>Odds Ratio</b> | <b>LL</b> | <b>UP</b> | <b>Pvalue</b> |
| Model 1: Univariate (unadjusted)                                           | 0.70              | 0.59      | 0.84      | <0.001        |
| Model 2: model 1 + age, sex, race/ethnicity                                | 0.75              | 0.62      | 0.90      | 0.002         |
| Model 3: model 2 + treatment group, any hypertension, kcal/day, met-hrs/wk | 0.83              | 0.69      | 1.00      | 0.054         |
| Model 4: model 3 + average A1c during follow-up                            | 1.01              | 0.82      | 1.23      | 0.96          |
| Model 5: model 3 + diabetes status at end of follow-up                     | 0.93              | 0.76      | 1.14      | 0.50          |
| <b>NEPHROPATHY</b>                                                         |                   |           |           |               |
| <b>Adjustment Covariates</b>                                               | <b>95% CI</b>     |           |           |               |
|                                                                            | <b>Odds Ratio</b> | <b>LL</b> | <b>UP</b> | <b>Pvalue</b> |
| Model 1: Univariate (unadjusted)                                           | 0.64              | 0.50      | 0.81      | <0.001        |
| Model 2: model 1 + age, sex, race/ethnicity                                | 0.68              | 0.53      | 0.87      | 0.002         |
| Model 3: model 2 + treatment group, any hypertension, kcal/day, met-hrs/wk | 0.76              | 0.59      | 0.98      | 0.031         |
| Model 4: model 3 + average A1c during follow-up                            | 0.88              | 0.68      | 1.15      | 0.35          |
| Model 5: model 3 + diabetes status at end of follow-up                     | 0.91              | 0.69      | 1.19      | 0.48          |
| <b>RETINOPATHY</b>                                                         |                   |           |           |               |
| <b>Adjustment Covariates</b>                                               | <b>95% CI</b>     |           |           |               |
|                                                                            | <b>Odds Ratio</b> | <b>LL</b> | <b>UP</b> | <b>Pvalue</b> |
| Model 1: Univariate (unadjusted)                                           | 0.66              | 0.50      | 0.88      | 0.004         |
| Model 2: model 1 + age, sex, race/ethnicity                                | 0.67              | 0.51      | 0.89      | 0.005         |
| Model 3: model 2 + treatment group, any hypertension, kcal/day, met-hrs/wk | 0.70              | 0.52      | 0.93      | 0.015         |
| Model 4: model 3 + average A1c during follow-up                            | 0.88              | 0.65      | 1.19      | 0.40          |
| Model 5: model 3 + diabetes status at end of follow-up                     | 0.76              | 0.56      | 1.03      | 0.08          |
| <b>NEUROPATHY</b>                                                          |                   |           |           |               |
| <b>Adjustment Covariates</b>                                               | <b>95% CI</b>     |           |           |               |
|                                                                            | <b>Odds Ratio</b> | <b>LL</b> | <b>UP</b> | <b>Pvalue</b> |
| Model 1: Univariate (unadjusted)                                           | 0.81              | 0.61      | 1.07      | 0.131         |
| Model 2: model 1 + age, sex, race/ethnicity                                | 0.91              | 0.67      | 1.22      | 0.523         |
| Model 3: model 2 + treatment group, any hypertension, kcal/day, met-hrs/wk | 1.01              | 0.74      | 1.37      | 0.972         |
| Model 4: model 3 + average A1c during follow-up                            | 1.16              | 0.85      | 1.60      | 0.35          |
| Model 5: model 3 + diabetes status at end of follow-up                     | 1.04              | 0.75      | 1.44      | 0.82          |

## SUPPLEMENTARY DATA

### DPP Research Group Investigators

#### **Pennington Biomedical Research Center (Baton Rouge, LA)**

George A. Bray, MD\*  
Kishore Gadde, MD\*  
Annie Chatellier, RN, CCRC\*\*  
Jennifer Arceneaux RN, BSN\*\*  
Amber Dragg RD, LDN\*\*  
Crystal Duncan, LPN  
Frank L. Greenway, MD  
Daniel Hsia, MD  
Erma Levy, RD  
Monica Lockett, LPN  
Donna H. Ryan, MD

#### **University of Chicago (Chicago, IL)**

David Ehrmann, MD\*  
Margaret J. Matulik, RN, BSN\*\*  
Kirsten Czech, MS  
Catherine DeSandre, BA

#### **Jefferson Medical College (Philadelphia, PA)**

Barry J. Goldstein, MD, PhD\*  
Kevin Furlong, DO\*  
Kellie A. Smith, RN, MSN\*\*  
Wendi Wildman, RN\*\*  
Constance Pepe, MS, RD

#### **University of Miami (Miami, FL)**

Ronald B. Goldberg, MD\*  
Jeanette Calles, MEd\*\*  
Juliet Ojito, RN\*\*  
Sumaya Castillo-Florez, MPH  
Hermes J. Florez, MD, PhD  
Anna Giannella, RD, MS  
Olga Lara  
Beth Veciana

#### **The University of Texas Health Science Center (San Antonio, TX)**

Steven M. Haffner, MD, MPH\*  
Helen P. Hazuda, PhD\*  
Maria G. Montez, RN, MSHP, CDE\*\*  
Kathy Hattaway, RD, MS  
Carlos Lorenzo, MD, PhD  
Arlene Martinez, RN, BSN, CDE  
Tatiana Walker, RD, MS, CDE

#### **University of Colorado (Denver, CO)**

Richard F. Hamman, MD, DrPH\*  
Dana Dabelea, MD, PhD\*  
Lisa Testaverde, MS\*\*  
Denise Anderson, RN, BSN  
Alexis Bouffard, MA, RN, BSN  
Tonya Jenkins, RD, CDE  
Dione Lenz, RN, BSN, CDE  
Leigh Perreault, MD

David W. Price, MD  
Sheila C. Steinke, MS

#### **Joslin Diabetes Center (Boston, MA)**

Edward S. Horton, MD\*  
Catherine S. Poirier, RN, BSN\*\*  
Kati Swift, RN, BSN\*\*  
Enrique Caballero, MD  
Barbara Fargnoli, RD  
Ashley Guidi, BS  
Mathew Guido, BA  
Sharon D. Jackson, MS, RD, CDE  
Lori Lambert, MS, RD, LD  
Kathleen E. Lawton, RN  
Sarah Ledbury, Med, RD  
Jessica Sansoucy, BS  
Jeanne Spellman, RD

#### **VA Puget Sound Health Care System and University of Washington (Seattle, WA)**

Steven E. Kahn, MB, ChB\*  
Brenda K. Montgomery, RN, BSN, CDE\*\*  
Wilfred Fujimoto, MD  
Robert H. Knopp, MD  
Edward W. Lipkin, MD  
Ivy Morgan-Taggart  
Anne Murillo, BS  
Lonnese Taylor, RN, BS  
April Thomas, RD, MPH, CDE  
Elaine C. Tsai, MD, MPH  
Dace Trencce, MD

#### **University of Tennessee (Memphis, TN)**

Abbas E. Kitabchi, PhD, MD, FACP\*  
Samuel Dagogo-Jack, MD\*  
Mary E. Murphy, RN, MS, CDE, MBA\*\*  
Laura Taylor, RN, BSN, CDE\*\*  
Jennifer Dolgoff, RN, BSN\*\*  
Debra Clark, LPN  
Uzoma Ibebuogu, MD  
Helen Lambeth, RN, BSN  
Harriet Ricks  
Lily M.K. Rutledge, RN, BSN  
Judith E. Soberman, MD

#### **Northwestern University's Feinberg School of Medicine (Chicago, IL)**

Mark E. Molitch, MD\*  
Boyd E. Metzger, MD\*  
Mariana K. Johnson, MS, RN\*\*  
Mimi M. Giles, MS, RD  
Diane Larsen, BS  
Samsam C. Pen, BA

#### **Massachusetts General Hospital (Boston, MA)**

David M. Nathan, MD\*

\* denotes Principal Investigator

\*\* denotes Program Coordinator

## SUPPLEMENTARY DATA

### DPP Research Group Investigators

Mary Larkin, MSN\*  
Charles McKittrick, BSN\*\*  
Heather Turgeon, BSN\*\*  
Ellen Anderson, MS, RD  
Laurie Bissett, MS, RD  
Kristy Bondi, BS  
Enrico Cagliero, MD  
Kali D'Anna  
Linda Delahanty, MS, RD  
Jose C. Florez, MD, PhD  
Valerie Goldman, MS, RD  
Peter Lou, MD  
Alexandra Poulos  
Elyse Raymond, BS  
Christine, Stevens  
Beverly Tseng  
**University of California-San Diego (San Diego, CA)**  
Elizabeth Barrett-Connor, MD\*  
Mary Lou Carrion-Petersen, RN, BSN\*\*  
Lauren N. Claravall, BS  
Jonalle M. Dowden, BS  
Javiva Horne, RD  
Diana Leos, RN, BSN  
Sundar Mudaliar, MD  
Jean Smith, RN  
Simona Szerdi Janisch, BS  
Karen Vejvoda, RN, BSN, CDE, CCRC  
**Columbia University (New York, NY)**  
F. Xavier Pi-Sunyer, MD\*  
Jane E. Lee, MS\*\*  
Sandra T. Foo, MD  
Susan Hagamen, MS, RN, CDE  
**Indiana University (Indianapolis, IN)**  
David G. Marrero, PhD\*  
Kieren J. Mather, MD\*  
Susie M. Kelly, RN, CDE\*\*  
Paula Putenney, RN\*\*  
Marcia A. Jackson\*\*  
Gina McAtee\*\*  
Ronald T. Ackermann, MD  
Carolyn M. Cantrell  
Edwin S. Fineberg, MD  
Angela Hadden (deceased)  
Mario S. Kirkman  
Erin O'Kelly Phillips  
Paris J. Roach, MD  
**Medstar Health Research Institute (Washington, DC)**  
Robert E. Ratner, MD\*  
Vanita Aroda, MD\*  
Sue Shapiro, RN, BSN, CCRC\*\*

Catherine Bavido-Arrage, MS, RD, LD  
Peggy Gibbs  
Gabriel Uwaifo, MD  
Renee Wiggins, RD  
**University of Southern California/UCLA Research Center (Alhambra, CA)**  
Mohammed F. Saad, MD\*  
Karol Watson, MD\*  
Medhat Botrous, MD\*\*  
Sujata Jinagouda, MD\*\*  
Maria Budget  
Claudia Conzues  
Perpetua Magpuri  
Kathy Ngo  
Kathy Xaphthalmous  
**Washington University (St. Louis, MO)**  
Neil H. White, MD, CDE\*  
Angela L. Brown, MD\*  
Samia Das, MS, MBA, RD, LD\*\*  
Prajakta Khare-Ranade, MSc, RDN, LD\*\*  
Tamara Stich, RN, MSN, CDE\*\*  
Ana Santiago, RN  
Cormarie Wernimont, RD, LD  
**Johns Hopkins School of Medicine (Baltimore, MD)**  
Christopher D. Saudek, MD\* (deceased)  
Sherita Hill Golden, MD, MHS, FAHA\*  
Tracy Whittington, BS\*\*  
Frederick L. Brancati, MD, MHS (deceased)  
Jeanne M. Clark, MD  
Alicia Greene  
Dawn Jiggetts  
Henry Mosley  
John Reusing  
Richard R. Rubin, PhD (deceased)  
Shawne Stephens  
Evonne Utsey  
**University of New Mexico (Albuquerque, NM)**  
David S. Schade, MD\*  
Karwyn S. Adams, RN, MSN\*\*  
Claire Hemphill, RN, BSN\*\*  
Penny Hyde, RN, BSN\*\*  
Janene L. Canady, RN, CDE\*\*  
Kathleen Colleran, MD  
Ysela Gonzales, RN, MSN  
Doris A. Hernandez-McGinnis  
Carolyn King  
**Albert Einstein College of Medicine (Bronx, NY)**  
Jill Crandall, MD\*  
Janet O. Brown, RN, MPH, MSN\*\*

\* denotes Principal Investigator

\*\* denotes Program Coordinator

## SUPPLEMENTARY DATA

### DPP Research Group Investigators

Gilda Trandafirescu, MD\*\*  
Elsie Adorno, BS  
Helena Duffy, MS, C-ANP  
Angela Goldstein, FNP-C, NPP, CSW  
Jennifer Lukin, BA  
Helen Martinez, RN, MSN, FNP-C  
Dorothy Pompei, BA  
Harry Shamoon, MD  
Jonathan Scheindlin, MD  
Elizabeth A. Walker, RN, DNSc, CDE  
Judith Wylie-Rosett, EdD, RD  
**University of Pittsburgh (Pittsburgh, PA)**  
Trevor Orchard, MD\*  
Andrea Kriska, PhD\*  
Susan Jeffries, RN, MSN\*\*  
M. Kaye Kramer, BSN, MPH\*\*  
Marie Smith, RN, BSN\*\*  
Catherine Benchoff  
Stephanie Guimond, BS  
Jessica Pettigrew, CMA  
Debra Rubinstein, MD  
Linda Semler, MS, RD  
Elizabeth Venditti, PhD  
Valarie Weinzierl, MPH  
**University of Hawaii (Honolulu, HI)**  
Richard F. Arakaki, MD\*  
Narleen K. Baker-Ladao, BS\*\*  
Mae K. Isonaga, RD, MPH\*\*  
Nina E. Bermudez, MS  
Marjorie K. Mau, MD  
John S. Melish, MD  
Robin E. Yamamoto, CDE, RD  
**Southwest American Indian Centers  
(Phoenix, AZ; Shiprock, NM; Zuni, NM)**  
William C. Knowler, MD, DrPH\*  
Norman Coeate\*\*  
Alvera Enotc\*\*  
Mary A. Hoskin, RD, MS\*\*  
Camille Natewa\*\*  
Carol A. Percy, RN, MS\*\*  
Kelly J. Acton, MD, MPH  
Vickie L. Andre, RN, FNP  
Roz Barber  
Shandiin Begay, MPH  
Brian C. Bucca, OD, FAAO  
Sherron Cook  
Jeff Curtis, MD  
Charlotte Dodge  
Matthew S. Doughty, MD  
Jason Kurland, MD  
Justin Glass, MD  
Martia Glass, MD

Robert L. Hanson, MD, MPH  
Louise E. Ingraham, MS, RD, LN  
Kathleen M. Kobus, RNC-ANP  
Jonathan Krakoff, MD  
Catherine Manus, LPN  
Cherie McCabe  
Sara Michaels, MD  
Tina Morgan  
Julie A. Nelson, RD  
Christopher Piromalli, DO  
Robert J. Roy  
Sandra Sangster, RD  
Miranda Smart  
Darryl P. Tonemah, PhD  
Rachel Williams, FNP  
Charlton Wilson, MD  
**George Washington University  
Biostatistics Center (DPP Coordinating  
Center, Rockville, MD)**  
Sarah Fowler, PhD\*  
Marinella Temprosa, PhD\*  
Michael Larsen, PhD\*  
Tina Brenneman\*\*  
Hanna Sherif, MS\*\*  
Sharon L. Edelstein, ScM\*\*  
Solome Abebe, MS  
Julie Bamdad, MS  
Melanie Barkalow  
Joel Bethupu  
Tsedenia Bezabeh  
Nicole Butler  
Jackie Callaghan  
Caitlin E. Carter  
Costas Christophi, PhD  
Gregory M. Dwyer  
Mary Foulkes, PhD  
Yuping Gao  
Robert Gooding  
Adrienne Gottlieb  
Nisha Grover  
Heather Hoffman, PhD  
Ashley N. Hogan  
Kathleen Jablonski, PhD  
Richard Katz, MD  
Preethy Kolinjivadi, MS  
John M. Lachin, ScD  
Yong Ma, PhD  
Qing Pan, PhD  
Susan Reamer  
Alla Sapozhnikova  
**Lifestyle Resource Core**  
Elizabeth M. Venditti, PhD\*

\* denotes Principal Investigator

\*\* denotes Program Coordinator

## SUPPLEMENTARY DATA

### DPP Research Group Investigators

Andrea M. Kriska, PhD  
Linda Semler, MS, RD, LDN  
Valerie Weinzierl, MPH  
**Central Biochemistry Laboratory (Seattle, WA)**

Santica Marcovina, PhD, ScD\*  
Greg Strylewicz, PhD\*\*  
John Albers, PhD  
**Epidemiological Cardiology Research Center- Epicare (Winston-Salem, NC)**

Ronald J. Prineas, MD, PhD\*  
Zhuming Zhang, MD\*  
Elsayed Soliman, MD\*  
Teresa Alexander  
Charles Campbell, MS  
Yabing Li, MD  
Sharon Hall  
Julie Hu, MSc  
Susan Hensley, BS  
Lisa Keasler  
Yabing Li, MD  
Margaret Mills  
Tonya Taylor  
**Fundus Photo Reading Center (Madison, WI)**

Ronald Danis, MD\*  
Matthew Davis, MD\*  
Larry Hubbard\*  
Ryan Endres\*\*  
Deborah Elsas\*\*  
Samantha Johnson\*\*  
Vonnice Gama  
Anne Goulding

**Carotid Ultrasound**  
Gregory Evans  
**Neurocognitive Assessment Group**

Jose A. Luchsinger, MD, MPH  
Jennifer Manly, PhD  
**NIH/NIDDK (Bethesda, MD)**

Judith Fradkin, MD  
Sanford Garfield, PhD  
Christine Lee, MD, MS  
**Centers for Disease Control & Prevention (Atlanta, GA)**

Edward Gregg, PhD  
Ping Zhang, PhD  
**University of Michigan (Ann Arbor, MI)**

William H. Herman, MD, MPH  
Michael Brändle, MD, MS  
Morton B. Brown, PhD  
**Nutrition Coding Center (Columbia, SC)**  
Elizabeth Mayer-Davis, PhD\*

Robert R. Moran, PhD\*\*  
**Quality of Well-Being Center (La Jolla, CA)**

Ted Ganiats, MD\*  
Andrew J. Sarkin, PhD\*\*  
Naomi Katzir  
Erik Groessl, PhD  
**Coronary Artery Calcification Reading Center**

Matthew Budoff, MD  
Chris Dailing  
**Dual Energy X-ray Absorptiometry Reading Center**

Ann Schwartz, PhD  
Caroline Navy  
Lisa Palermo, MS  
**\*Genetics Working Group**

Jose C. Florez, MD, PhD<sup>1,2</sup>  
David Altshuler, MD, PhD<sup>1,2</sup>  
Liana K. Billings, MD<sup>9,10</sup>  
Ling Chen, MS<sup>1</sup>  
Maegan Harden, BS<sup>2</sup>  
Robert L. Hanson, MD, MPH<sup>3</sup>  
William C. Knowler, MD, DrPH<sup>3</sup>  
Toni I. Pollin, PhD<sup>4</sup>  
Alan R. Shuldiner, MD<sup>4</sup>  
Kathleen Jablonski, PhD<sup>5</sup>  
Paul W. Franks, PhD, MPhil, MS<sup>6,7,8</sup>  
Marie-France Hivert, MD<sup>1</sup>

1=Massachusetts General Hospital

2=Broad Institute

3=NIDDK

4=University of Maryland

5=Coordinating Center

6=Lund University, Sweden

7=Umeå University, Sweden

8=Harvard School of Public Health

9=NorthShore University HealthSystem

10=University of Chicago Pritzker School of Medicine

\* denotes Principal Investigator

\*\* denotes Program Coordinator
